# Supplementary material for: A Comparison of Central Composite Design and Taguchi Method for Optimizing Fenton Process
Source: Hindawi journal article supplement (doi:10.1155/2014/869120), 2014-01-01
Supplement: f1 [file 869120.f1.pdf]

## SUPPLEMENTARY DATA

**Figure A.1** Normal Probability plot of quadratic model fit to the data of response COD(%)

**Figure A.2** Normal Probability plot of quadratic model fit to the data of response

Decolorization (%)

**Figure A.3** Effect of a)  $\text{H}_2\text{O}_2$ :  $\text{Fe}^{+2}$  b) Dye:  $\text{Fe}^{+2}$  c) pH

**Figure A.4** Effect of Dye:  $\text{Fe}^{+2}$  on COD removal (a) Two dimensional contour and (b) Three dimensional surface

**Figure A.5** Effect of  $\text{H}_2\text{O}_2$ :  $\text{Fe}^{+2}$  on COD removal (a) Two dimensional contour and (b) Three dimensional contour

**Figure A.6** Effect of pH on COD removal efficiency (a) two dimensional contour and (b) Three dimensional surface

**Figure A.7** Interaction of parameters for COD removal

**Figure A.8** Interaction of parameters for decolorization

Design-Expert® Software  
COD

Color points by value of  
COD:  
87.7095  
30.1676

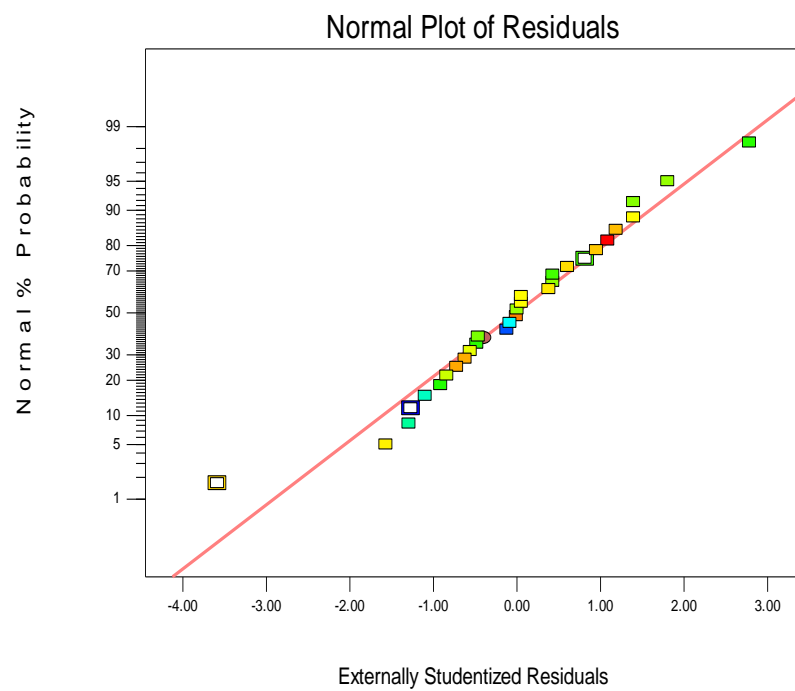

**Figure A.1** Normal Probability plot of quadratic model fit to the data of response COD(%)

Design-Expert® Software  
Decolorization

Color points by value of  
Decolorization:

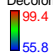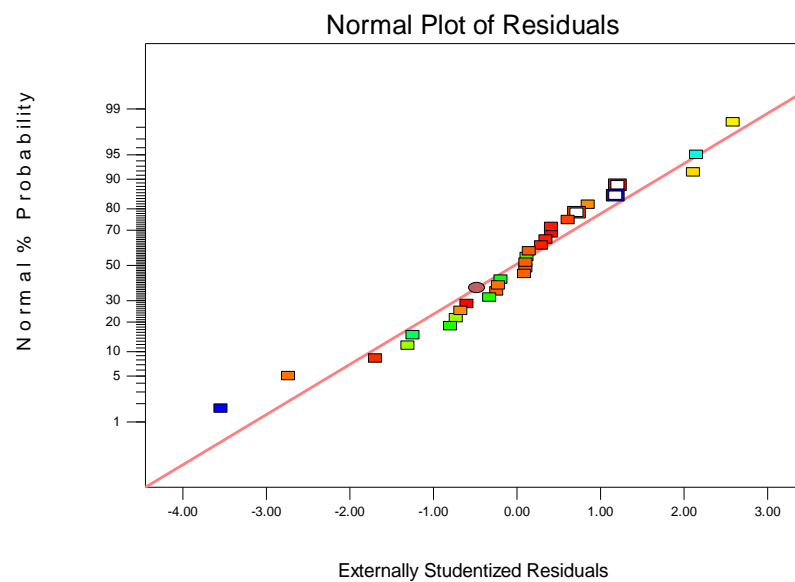

**Figure A.2** Normal Probability plot of quadratic model fit to the data of response  
Decolorization (%)

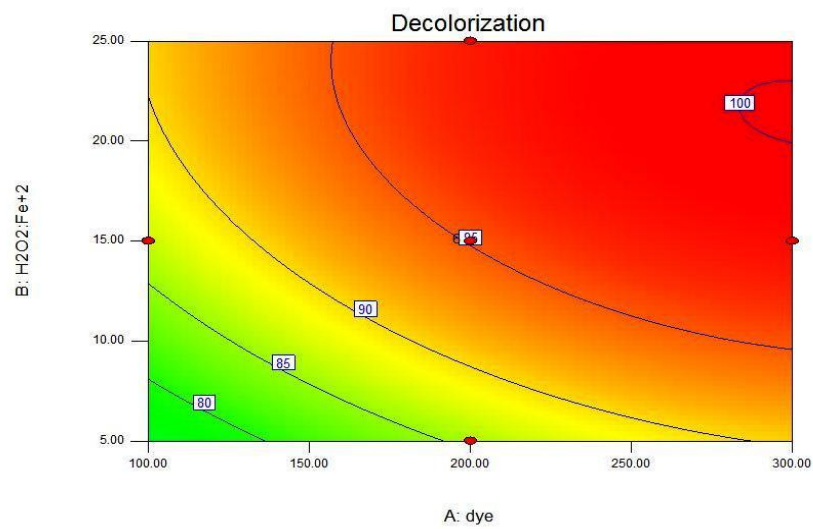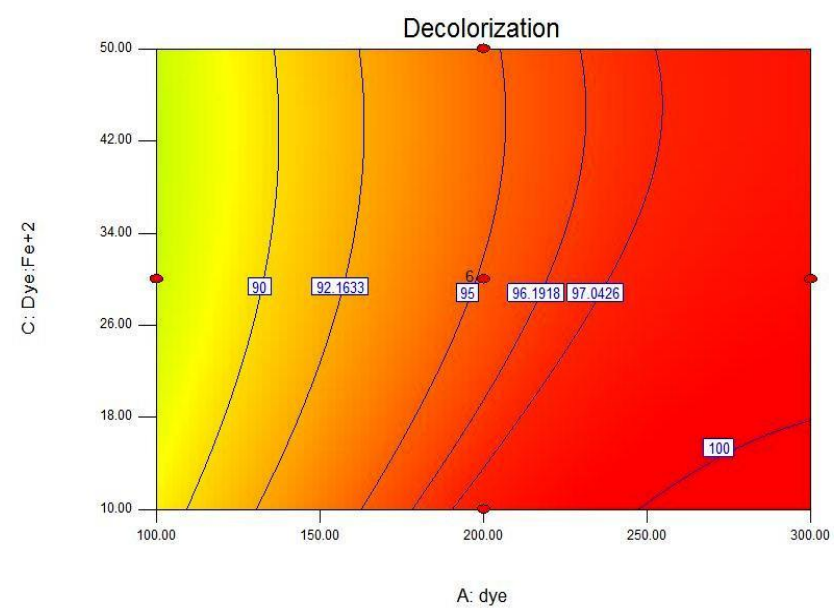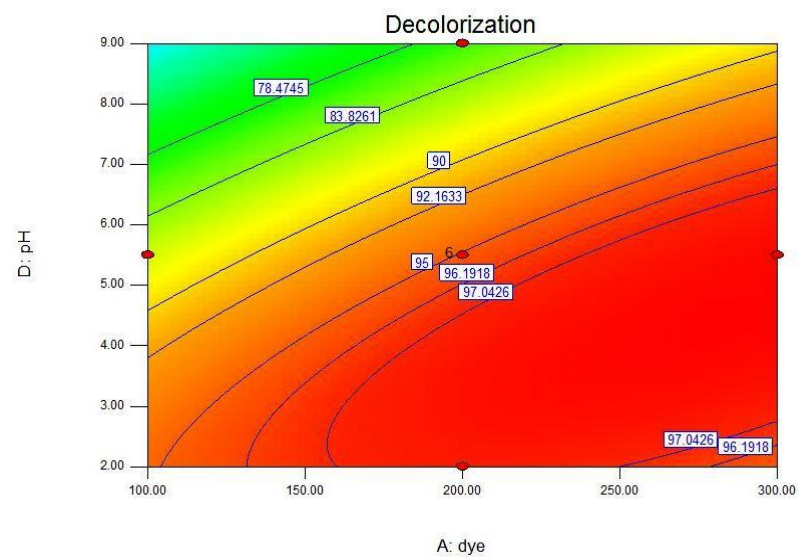

**Figure A.3** Effect of a) H<sub>2</sub>O<sub>2</sub>: Fe<sup>2+</sup> b) Dye: Fe<sup>2+</sup> c) pH on decolorization

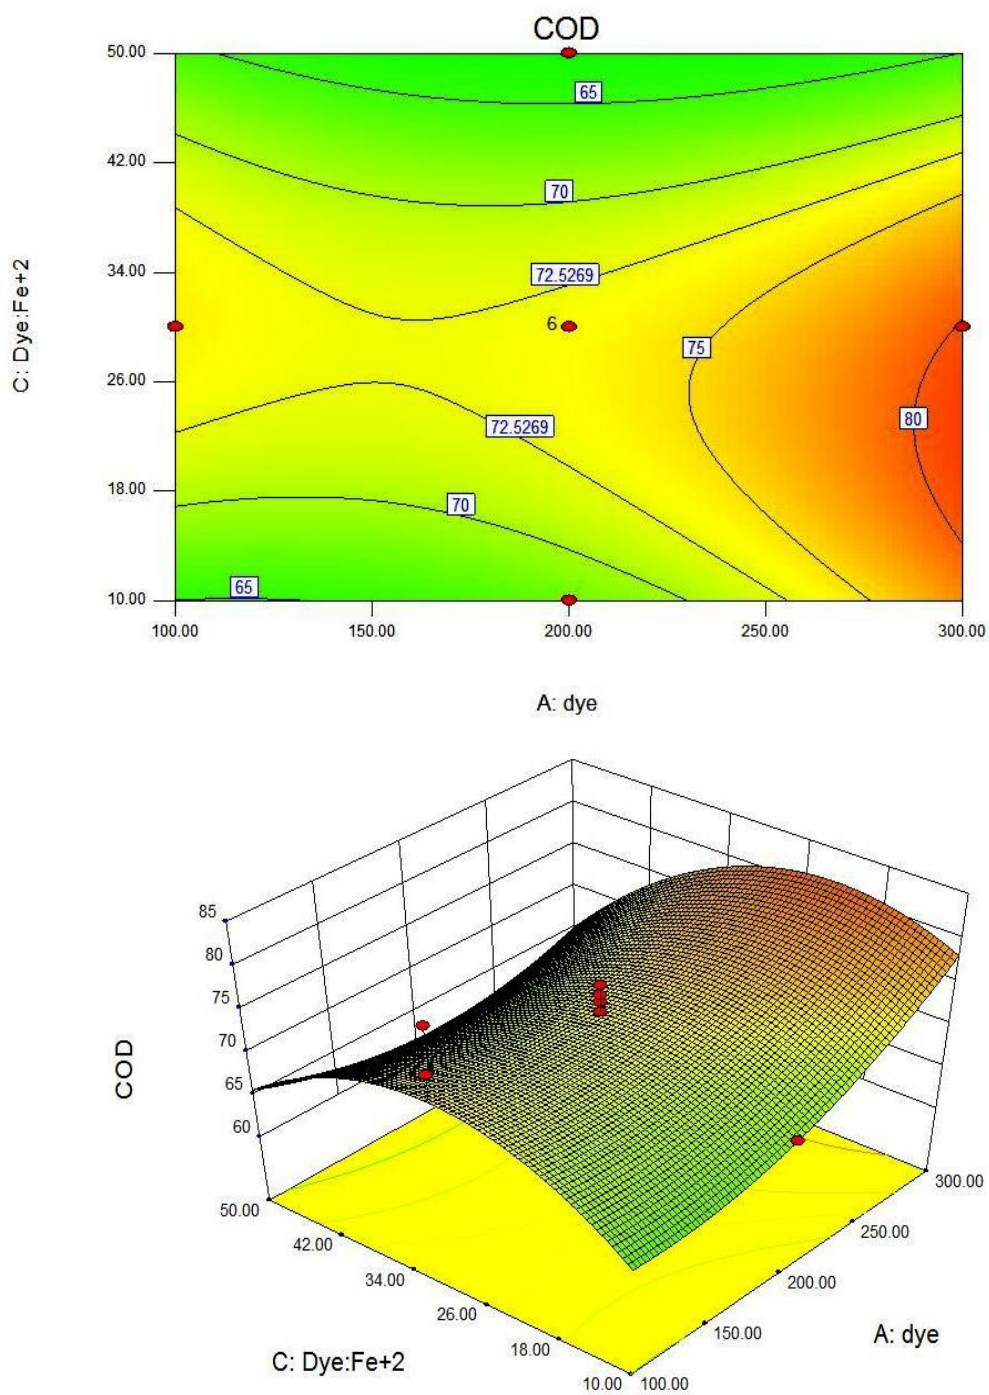

**Figure A.4** Effect of Dye: Fe<sup>2+</sup> on COD removal (a) Two dimensional contour and (b) Three dimensional surface

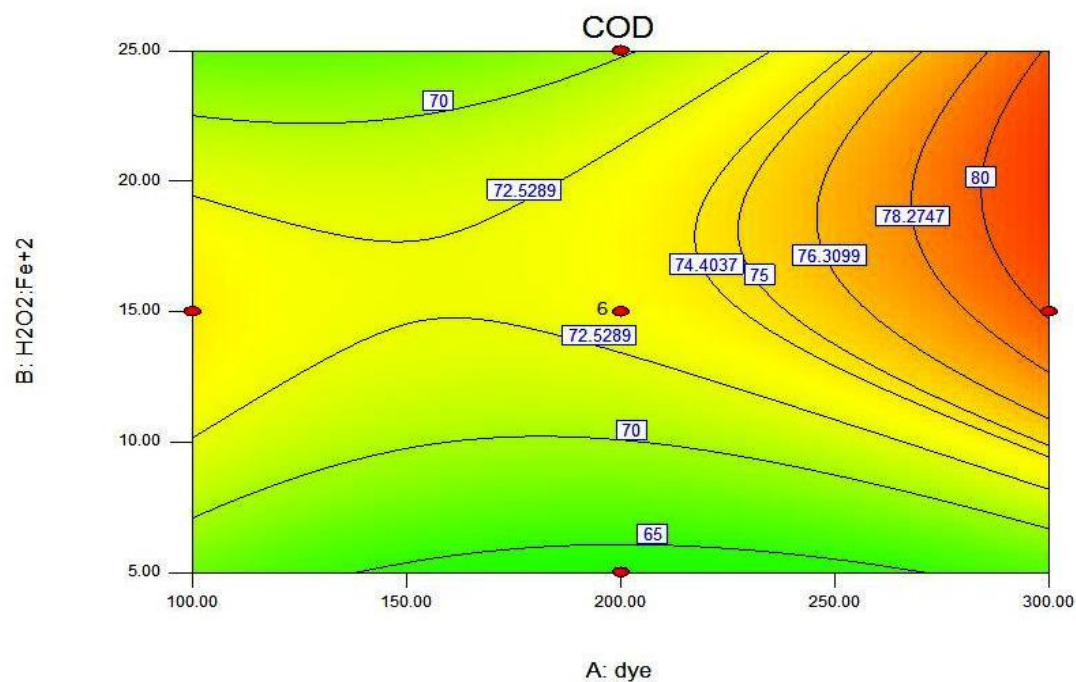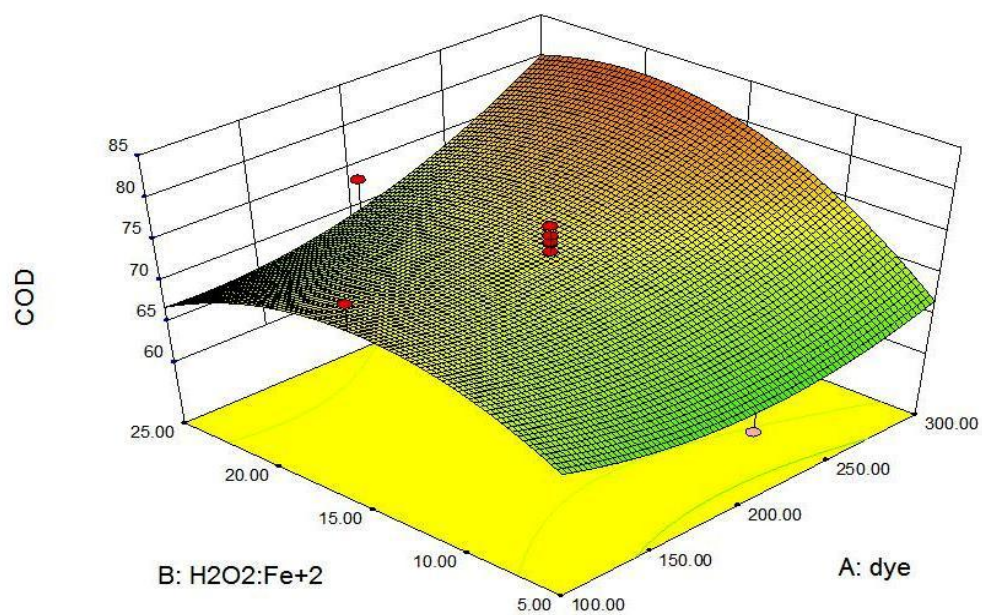

**Figure A.5** Effect of H<sub>2</sub>O<sub>2</sub>: Fe<sup>2+</sup> on COD removal (a) Two dimensional contour and (b) Three dimensional contour



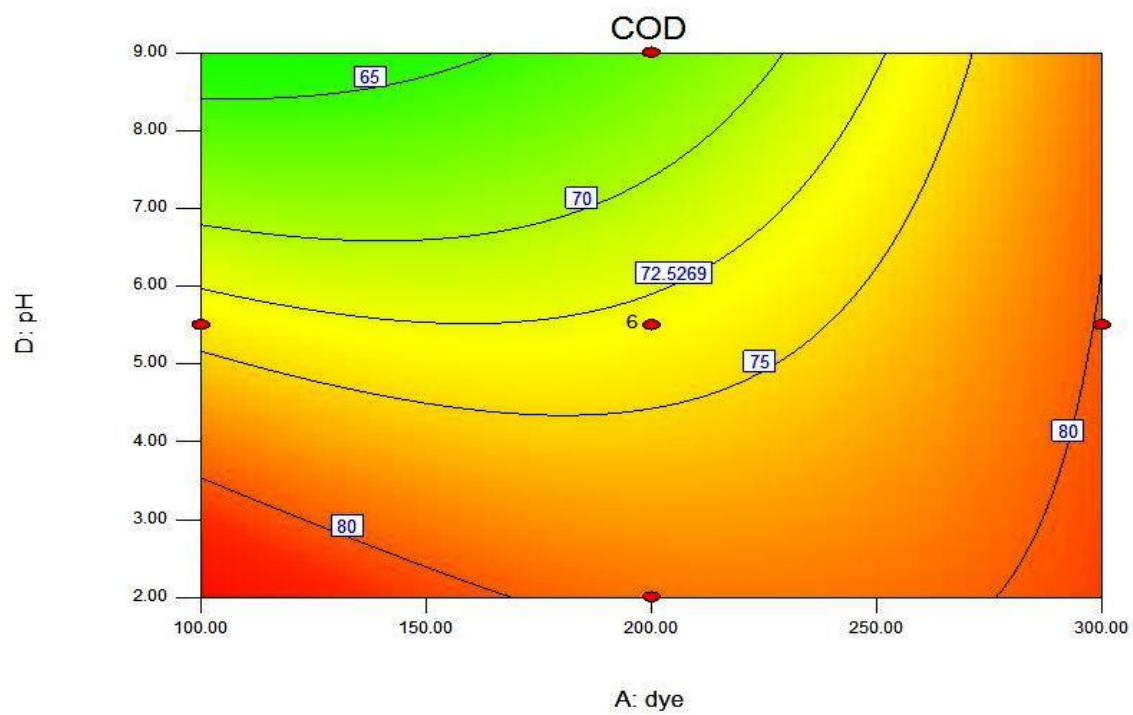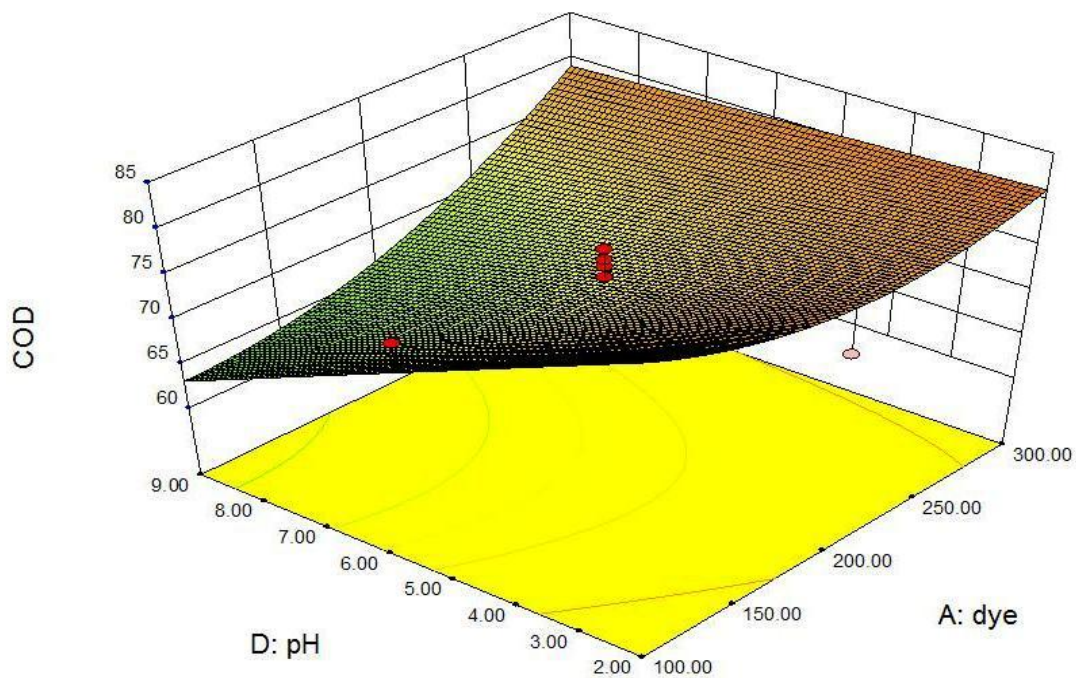

**Figure A.6** Effect of pH on COD removal efficiency (a) two dimensional contour and (b) Three dimensional surface

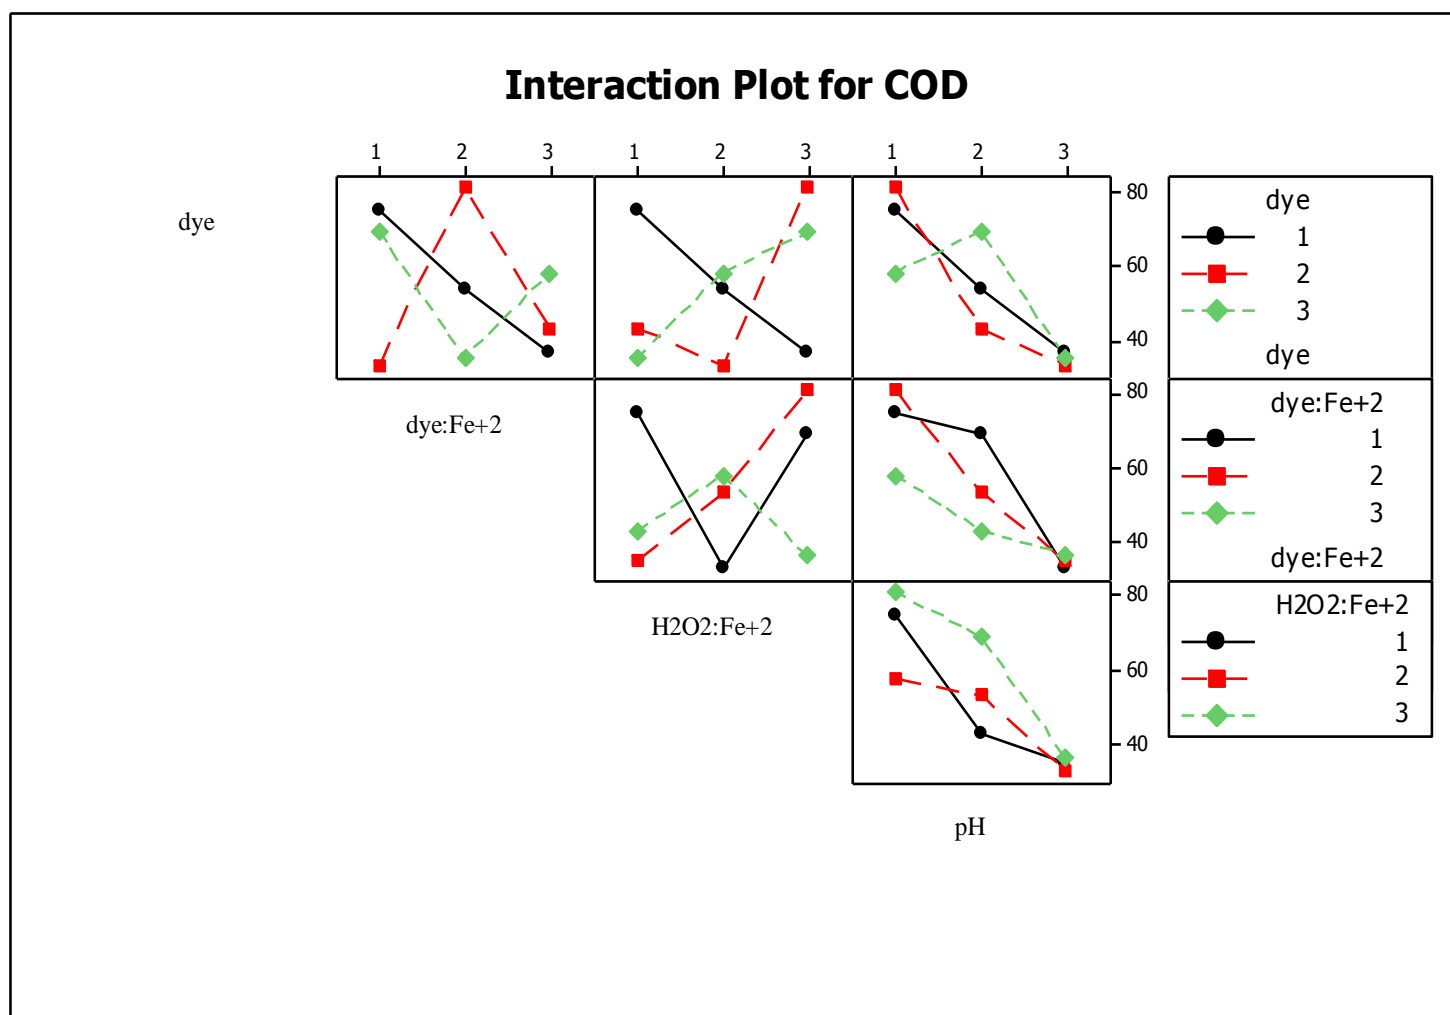

**Figure A.7** Interaction of parameters for COD removal



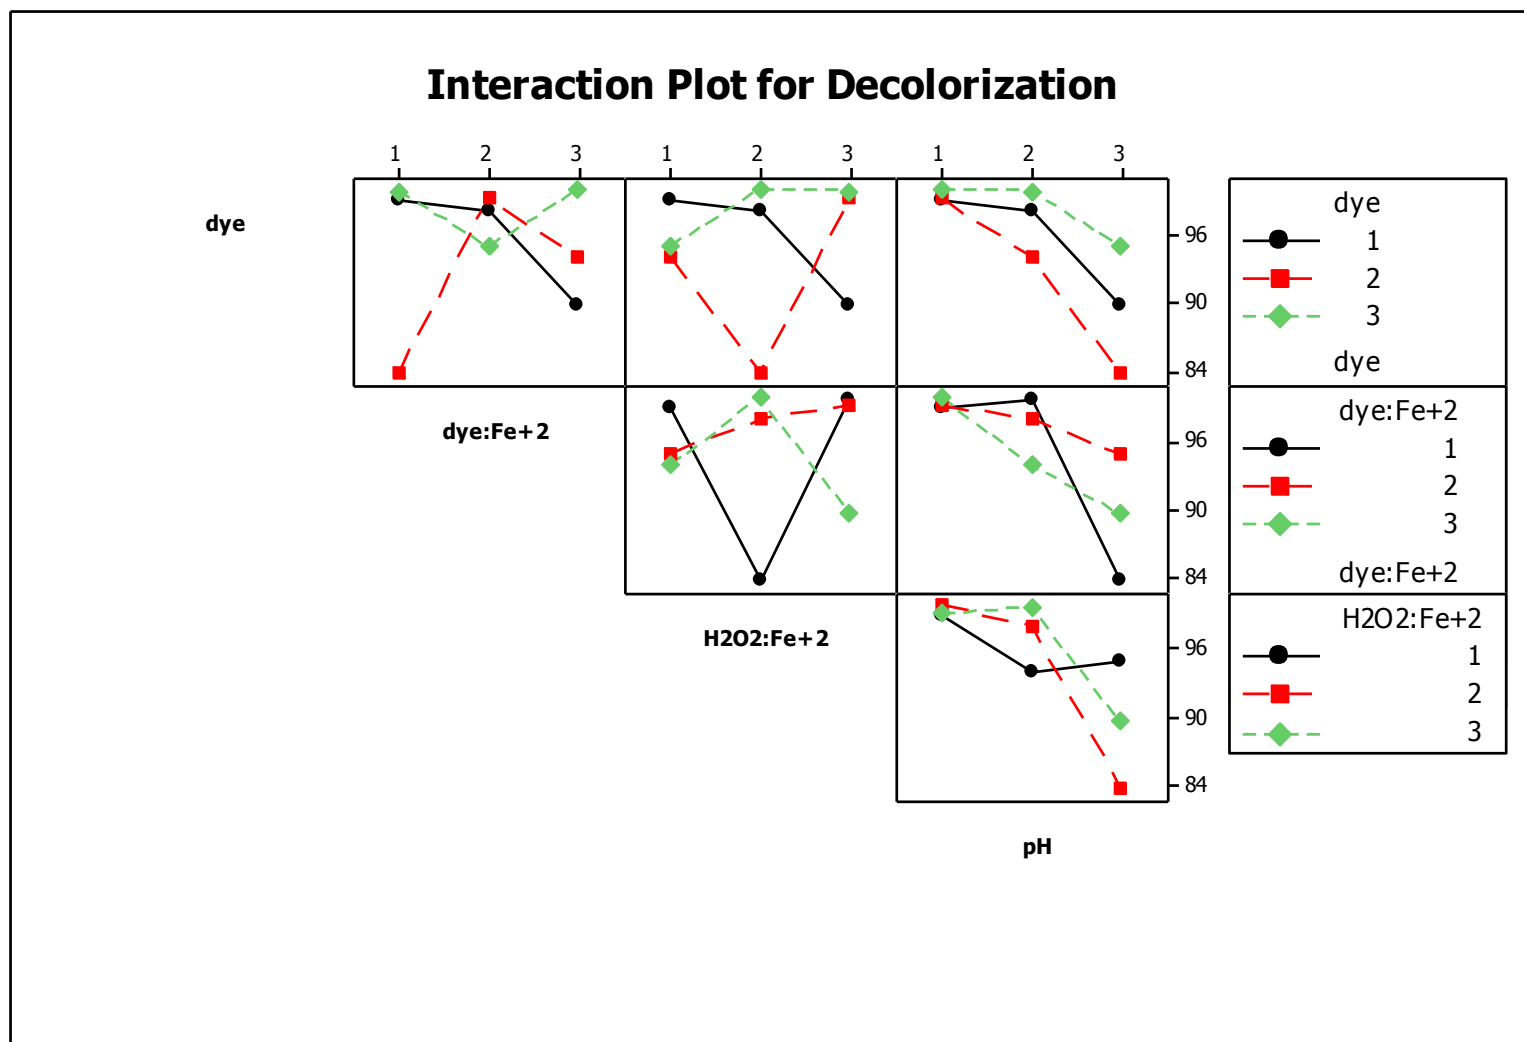

**Figure A.8** Interaction of parameters for decolorization
